# Supplementary material
Source: HighWire-hosted journal article supplement (https://www.jneurosci.org/highwire/filestream/600051/field_highwire_adjunct_files/2/Figure_S3.pdf)

Figure S3

L2/3 components of axons in deprived animals

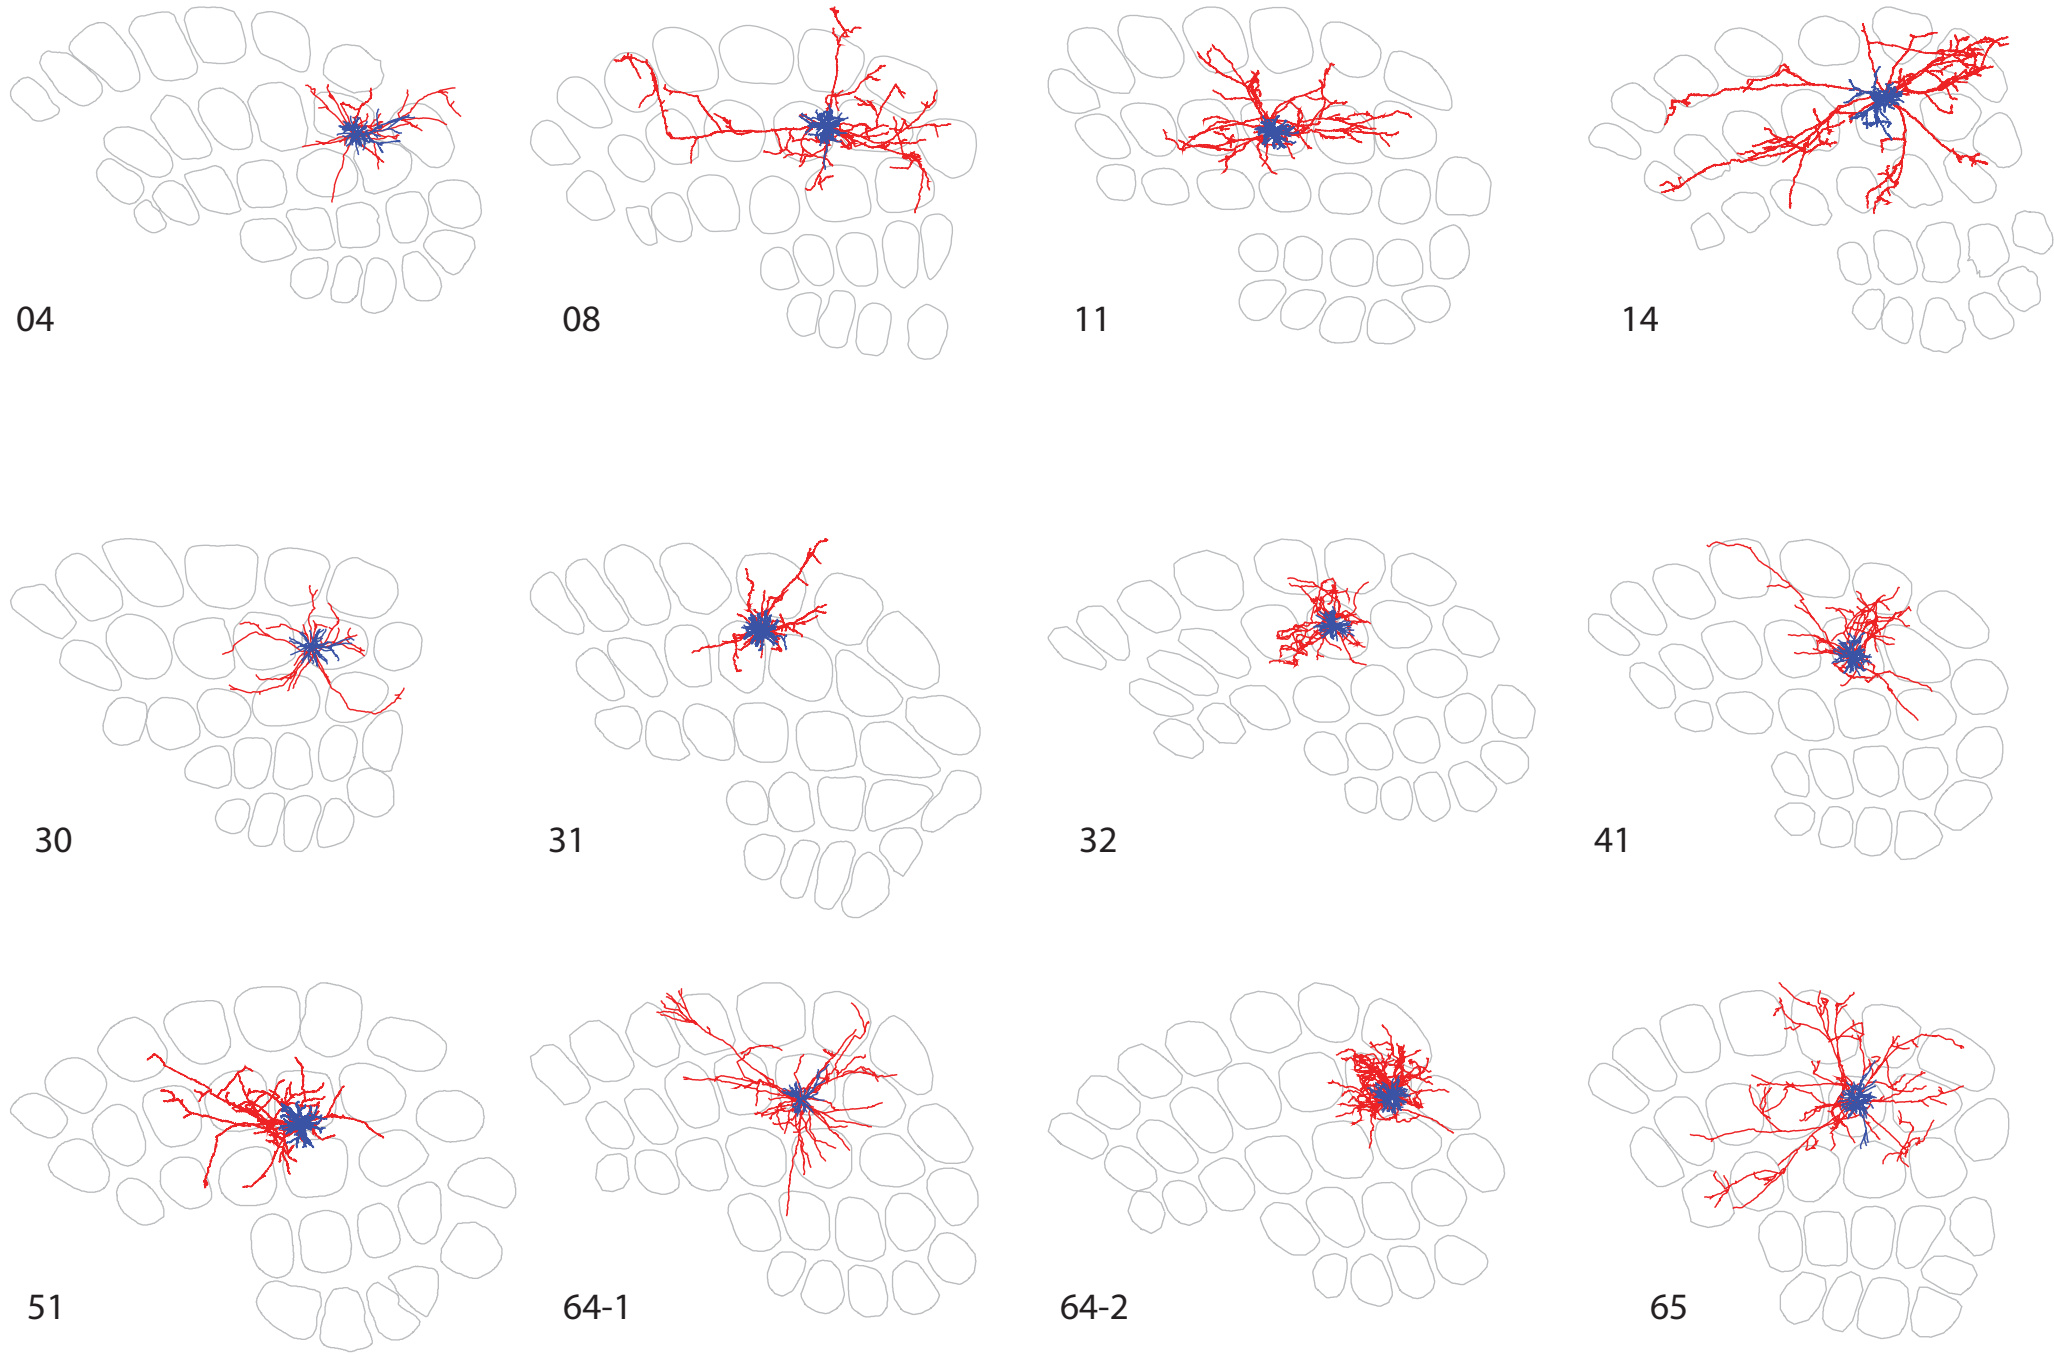

500  $\mu$ m

Supplement: Figure_S3.pdf [file Figure_S3.pdf]
